# Supplementary material for: Direct molecular confinement in layered double hydroxides: from fundamental to advanced photo-luminescent hybrid materials
Source: Royal Society of Chemistry journal article supplement (doi:10.1039/d0qi01349h), 2020-12-23
Supplement: d0qi01349h1.pdf [file d0qi01349h1.pdf]

Supporting Information:

**Direct Molecular Confinement in Layered Double Hydroxides: From Fundamentals to Advanced Photo-luminescent Hybrid Materials**

Fen-Di Zhang,<sup>a</sup> Chang-Gen Lin,<sup>\*a</sup> Shu-Jing Diao,<sup>a</sup> Haralampos N. Miras<sup>b</sup> and Yu-Fei Song<sup>\*a,c</sup>

<sup>a</sup>State Key Laboratory of Chemical Resource Engineering, Beijing Advanced Innovation Center for Soft Matter Science and Engineering, Beijing University of Chemical Technology, Beijing 100029 P. R. China.

<sup>b</sup>WestCHEM, School of Chemistry, University of Glasgow, Glasgow, G12 8QQ, UK.

<sup>c</sup>School of Chemical Engineering, Qinghai University, Qinghai, 810016, P. R. China

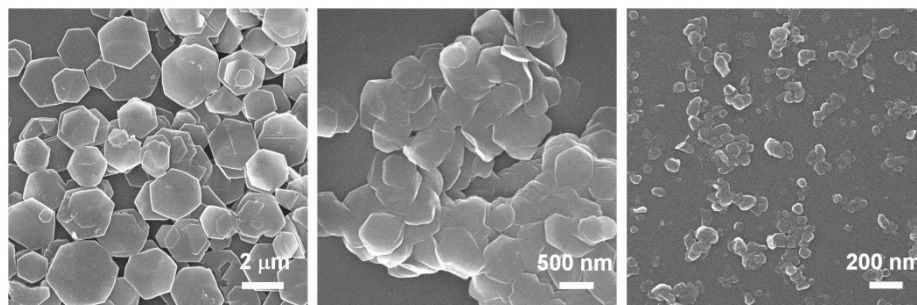

**Fig. S1** The SEM images of as-prepared Mg<sub>2</sub>Al-L (left), Mg<sub>2</sub>Al-M (mid), and Mg<sub>2</sub>Al-S (right).

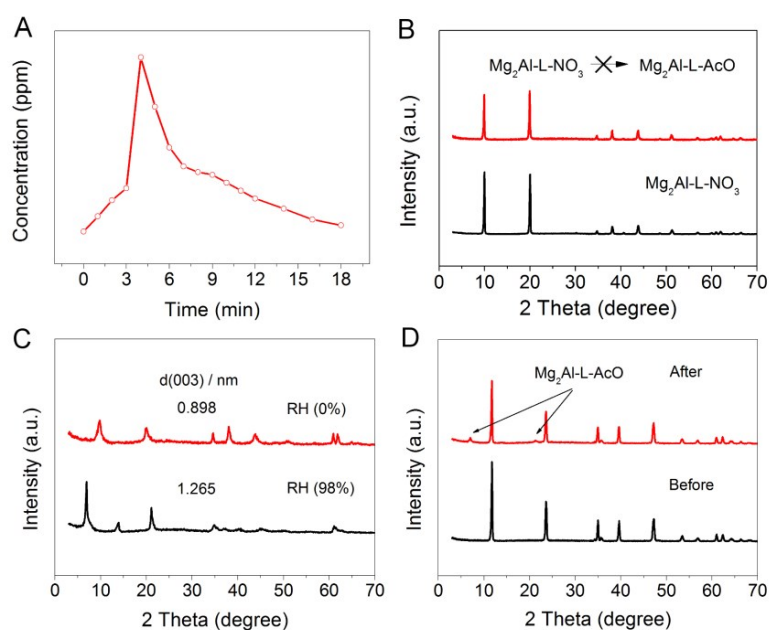

**Fig. S2** A) The concentration curve of CO<sub>2</sub> during acetates intercalation reaction, B) the powder XRD patterns of Mg<sub>2</sub>Al-L-NO<sub>3</sub> before and after reaction, C) the powder XRD patterns of Mg<sub>2</sub>Al-L-AcO at different relative humidity (RH), and D) the powder XRD patterns of Mg<sub>2</sub>Al-L before and after reaction in water.

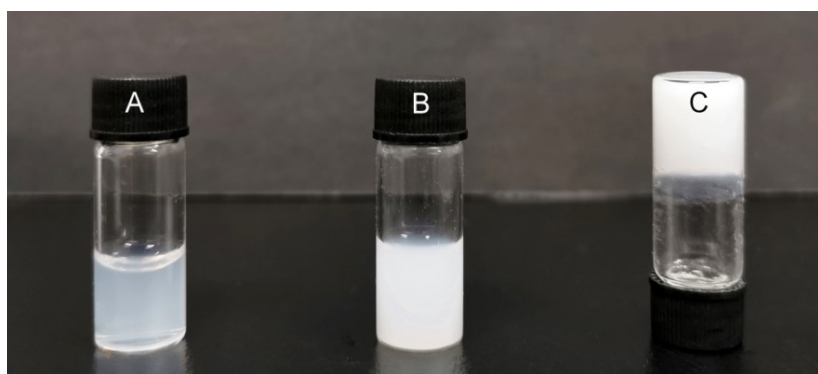

**Fig. S3** The photographs of Mg<sub>2</sub>Al-M-AcO in water at different concentrations: A)  $c = 1 \text{ mg mL}^{-1}$ , B)  $c = 10 \text{ mg mL}^{-1}$ , and C)  $c = 20 \text{ mg mL}^{-1}$ .

**Table S1.** The experimental parameters and yields of the intercalation reactions.

|                     | LDHs                 | Organic acid               | pKa                                        | <i>n</i><br>(mmol) | <i>V</i> or <i>m</i> | Yield          |                |
|---------------------|----------------------|----------------------------|--------------------------------------------|--------------------|----------------------|----------------|----------------|
| The direct method   | Mg <sub>2</sub> Al-L |                            |                                            | 2.463              | 141 μL               | 103 mg 92.03 % |                |
|                     | Mg <sub>2</sub> Al-M |                            |                                            | 1.231              | 71 μL                | 94 mg 83.54 %  |                |
|                     | Mg <sub>2</sub> Al-S |                            |                                            | 1.026              | 59 μL                | 88 mg 78.62 %  |                |
|                     | Zn <sub>2</sub> Al-L | Acetic acid                | 4.76                                       | 1.642              | 78 μL                | 76 mg 52.19 %  |                |
|                     | Ni <sub>2</sub> Fe-L |                            |                                            | 3.284              | 188 μL               | 80 mg 52.63 %  |                |
|                     | Co <sub>2</sub> Al-L |                            |                                            | 1.642              | 78 μL                | 93 mg 66.27 %  |                |
|                     | Tris-LDH             |                            |                                            | 0.616              | 35 μL                | 96 mg 83.70 %  |                |
|                     |                      |                            | Chloroacetic acid                          | 2.86               | 2.463                | 147 μL         | 105 mg 83.29 % |
|                     |                      |                            | Dichloroacetic acid                        | 1.30               | 2.463                | 203 μL         | 125 mg 89.16 % |
|                     |                      |                            | Propionic acid                             | 4.87               | 3.284                | 245 μL         | 105 mg 89.22 % |
|                     |                      |                            | Acrylic acid                               | 4.26               | 2.463                | 169 μL         | 98 mg 83.84 %  |
|                     |                      | Mg <sub>2</sub> Al-L       | <i>p</i> -Fluorobenzoic acid               | 4.14               | 2.873                | 403 mg         | 127 mg 87.71 % |
|                     |                      |                            | <i>p</i> -Toluic acid                      | 4.35               | 2.873                | 391 mg         | 104 mg 72.64 % |
|                     |                      |                            | <i>p</i> -Nitrobenzoic acid                | 3.44               | 2.873                | 480 mg         | 120 mg 76.98 % |
|                     |                      |                            | <i>p</i> -Hydroxybenzoic acid              | 4.48               | 2.873                | 397 mg         | 100 mg 69.46 % |
|                     |                      | <i>p</i> -phthalic acid    | 3.54                                       | 1.231              | 205 mg               | 106 mg 87.33 % |                |
| The stepwise method |                      |                            |                                            |                    |                      |                |                |
|                     |                      |                            | Trichloroacetic acid                       | 0.70               | 2.586                | 259 μL         | 134 mg 86.82 % |
|                     |                      |                            | Glycolic acid                              | 3.83               | 2.586                | 197 mg         | 106 mg 89.79 % |
|                     |                      |                            | Lactic acid                                | 3.86               | 3.284                | 245 μL         | 114 mg 91.98 % |
|                     |                      |                            | Oxalic acid                                | 1.27               | 3.284                | 296 mg         | 92 mg 86.66 %  |
|                     |                      |                            | Propanedioic acid                          | 2.85               | 3.284                | 342 mg         | 97 mg 88.77 %  |
|                     |                      |                            | Succinic Acid                              | 4.19               | 3.284                | 388 mg         | 99 mg 88.10 %  |
|                     |                      |                            | Benzoic Acid                               | 4.20               | 3.284                | 401 mg         | 117 mg 85.15 % |
|                     |                      |                            | Methanesulfonic acid                       | -1.92              | 0.821                | 53 μL          | 110 mg 86.80 % |
|                     |                      |                            | Ethanesulfonic acid                        | -1.68              | 1.231                | 136 mg         | 70 mg 52.84 %  |
|                     |                      |                            | Isethionic acid                            | -1.60              | 0.739                | 93 mg          | 111 mg 79.83 % |
|                     |                      | Mg <sub>2</sub> Al-L       | 2-Acrylamido-2-methylpropane sulfonic acid | --                 | 1.231                | 255 mg         | 140 mg 81.22 % |
|                     |                      |                            | <i>p</i> -Toluenesulfonic acid             | -2.80              | 1.231                | 234 mg         | 124 mg 78.50 % |
|                     |                      |                            | 1,2-Ethanedisulfonic acid                  | --                 | 0.616                | 117 mg         | 100 mg 60.48 % |
|                     |                      |                            | 1,5-Naphthalenedisulfonic acid             | --                 | 1.642                | 473 mg         | 120 mg 58.36 % |
|                     |                      | Methylenediphosphonic acid | --                                         | 0.739              | 130 mg               | 97 mg 78.61 %  |                |
|                     |                      | Phenylphosphonic acid      | --                                         | 1.642              | 260 mg               | 110 mg 72.29 % |                |
|                     |                      | TPE carboxylic acid        | --                                         | 0.821              | 309 mg               | 185 mg 76.51 % |                |

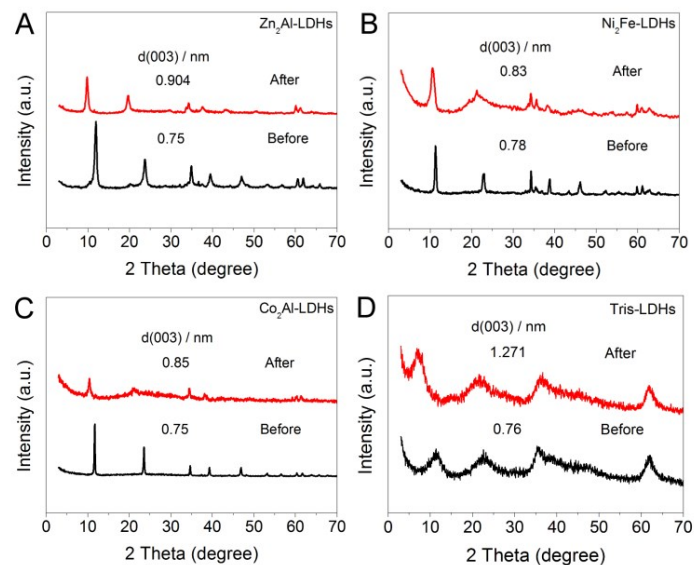

**Fig. S4** The powder XRD of A) Zn<sub>2</sub>Al-LDHs, B) Ni<sub>2</sub>Fe-LDHs, C) Co<sub>2</sub>Al-LDHs, and D) Tris-LDHs before and after acetate intercalation.

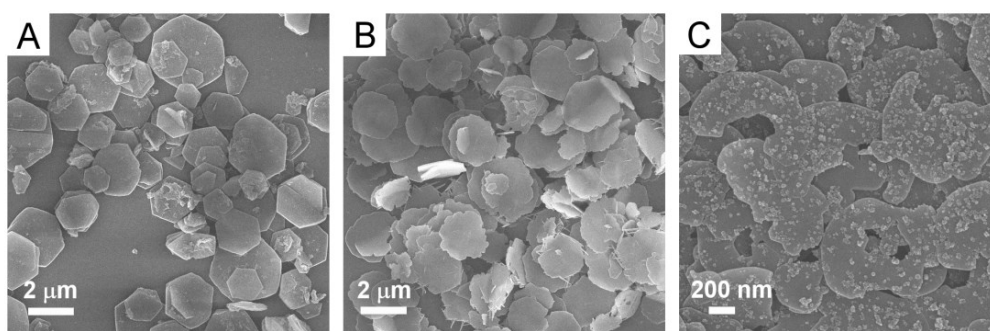

**Fig. S5** The SEM images of A) Zn<sub>2</sub>Al-LDHs, B) Ni<sub>2</sub>Fe-LDHs, C) Co<sub>2</sub>Al-LDHs after acetate intercalation.

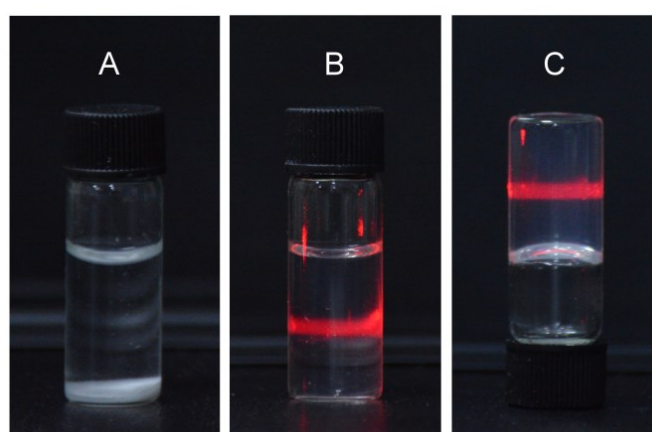

**Fig. S6** The photographs of A) Tris-LDHs dispersed in water (*c*: 10 mg mL<sup>-1</sup>), B) Tris-LDHs-AcO in water (*c*: 10 mg mL<sup>-1</sup>), and C) the gel state of Tris-LDHs-AcO in water (*c*: 25 mg mL<sup>-1</sup>).

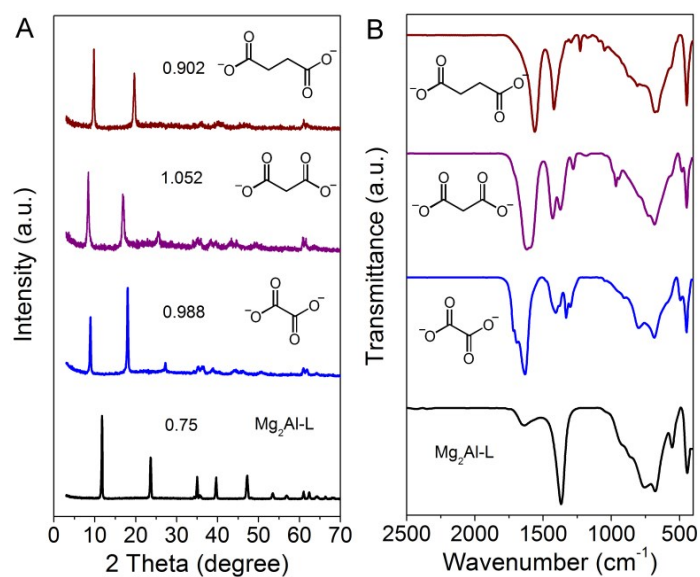

**Fig. S7** A) The powder XRD and B) the FT-IR of  $Mg_2Al-L$  intercalated with different aliphatic dicarboxylates.

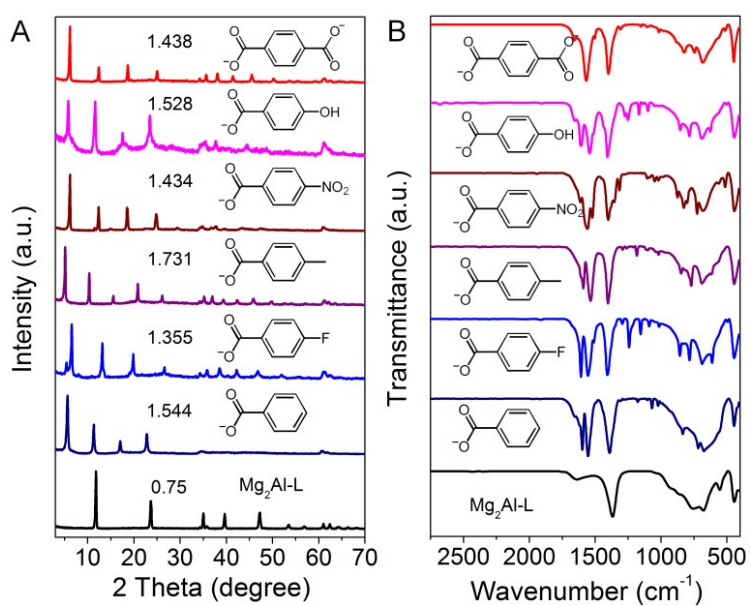

**Fig. S8** A) The powder XRD and B) the FT-IR of  $Mg_2Al-L$  intercalated with different aromatic carboxylates.

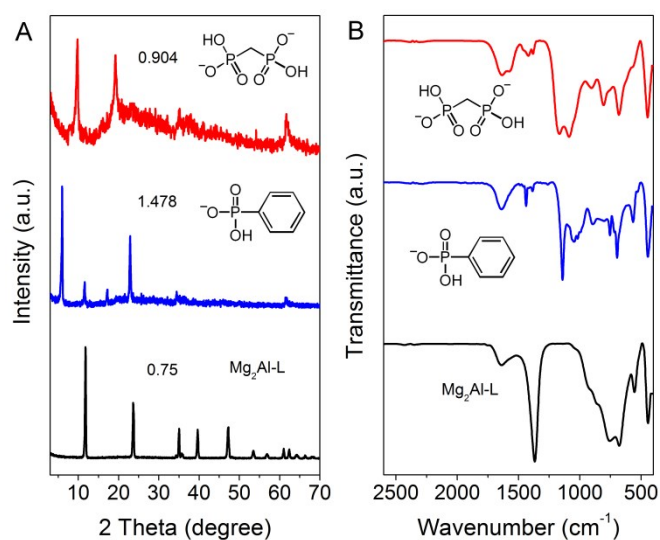

**Fig. S9** A) The powder XRD and B) the FT-IR of  $\text{Mg}_2\text{Al-L}$  intercalated with different phosphonates.

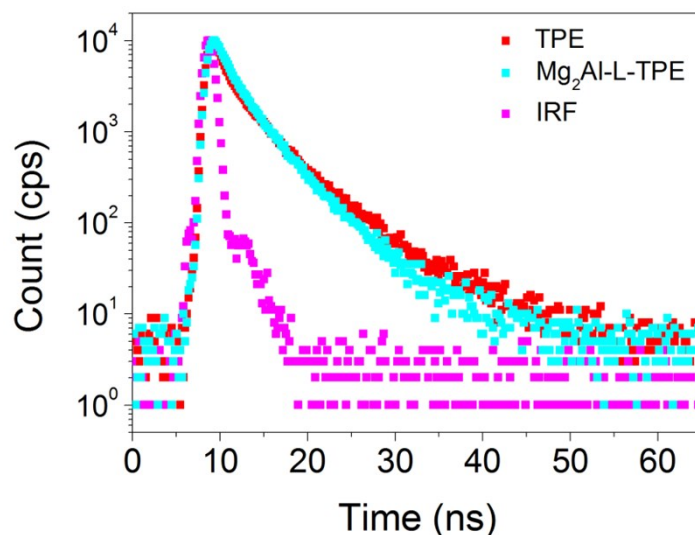

**Fig. S10** The fluorescence decay curves of TPE carboxylates and the  $\text{Mg}_2\text{Al-L-TPE}$  hybrid, where the lifetime  $\tau$  is obtained by fitting the equation  $I_t = I_0 + B_1 \cdot \exp(-t/\tau_1) + B_2 \cdot \exp(-t/\tau_2)$ , and  $\tau = B_1 \cdot \tau_1^2 + B_2 \cdot \tau_2^2 / (B_1 \cdot \tau_1 + B_2 \cdot \tau_2)$ .

**Table S2.** The fluorescence lift time and absolute quantum yield of TPE carboxylates and the  $\text{Mg}_2\text{Al-L-TPE}$  hybrid.

|                              | Life time (ns) |       |       |          |          |        | Quantum yield (%) |
|------------------------------|----------------|-------|-------|----------|----------|--------|-------------------|
|                              | $I_0$          | $B_1$ | $B_2$ | $\tau_1$ | $\tau_2$ | $\tau$ |                   |
| TPE carboxylates             | 1.804          | 0.239 | 0.046 | 1.42     | 5.41     | 3.10   | 16.88             |
| $\text{Mg}_2\text{Al-L-TPE}$ | 2.017          | 0.183 | 0.047 | 1.72     | 4.68     | 2.94   | 23.72             |
